# Supplementary material
Source: publisher figshare collection journal article supplement (https://future-science-group.figshare.com/ndownloader/files/34131939)
Supplement: Supplementary file 1 [file 34131939]

## Sheet: results-cf-pearson-annotated
r in CF (r1)	r in controls (r2)	padj	r1-r2	Affymetrix1	RefSeq1	Gene1	Affymetrix2	RefSeq2	Gene2
0.554595	-0.676234	1.61979e-100	1.23083	1487_at	NM_004451	ESRRA	200022_at	NM_000979	RPL18
-0.690518	0.480878	2.9923e-90	-1.1714	200007_at	NM_003134	SRP14	200019_s_at	NM_001997	FAU
-0.338119	0.599176	1.04629e-78	-0.937295	200007_at	NM_003134	SRP14	200008_s_at	NM_001494	GDI2
0.214453	-0.790085	2.36697e-74	1.00454	200013_at	NM_000986	RPL24	200021_at	NM_005507	CFL1
0.379272	-0.515075	2.51372e-73	0.894346	1487_at	NM_004451	ESRRA	200013_at	NM_000986	RPL24
0.113786	-0.666617	1.24808e-72	0.780403	1487_at	NM_004451	ESRRA	200008_s_at	NM_001494	GDI2
-0.375523	0.507545	5.02076e-70	-0.883068	200020_at	NM_007375	TARDBP	200022_at	NM_000979	RPL18
-0.607139	0.39966	2.20269e-67	-1.0068	200000_s_at	NM_006445	PRPF8	200022_at	NM_000979	RPL18
0.445567	-0.415577	7.77925e-66	0.861145	1487_at	NM_004451	ESRRA	200002_at	NM_007209	RPL35
-0.336638	0.541265	4.34605e-65	-0.877903	200000_s_at	NM_006445	PRPF8	200011_s_at	NM_001659	ARF3
-0.420339	0.632251	8.92546e-64	-1.05259	200004_at	NM_001418	EIF4G2	200010_at	NM_000975	RPL11
-0.298972	0.55445	2.88017e-61	-0.853422	200001_at	NM_001749	CAPNS1	200017_at	NM_002954	RPS27A
0.381604	-0.284478	1.88439e-55	0.666082	200021_at	NM_005507	CFL1	200022_at	NM_000979	RPL18
0.317833	-0.468416	2.28476e-53	0.786249	200021_at	NM_005507	CFL1	200023_s_at	NM_003754	EIF3F
0.00567837	-0.773156	5.17496e-53	0.778835	200008_s_at	NM_001494	GDI2	200021_at	NM_005507	CFL1
-0.0337414	-0.671109	7.07306e-53	0.637367	1487_at	NM_004451	ESRRA	200014_s_at	NM_004500	HNRNPC
0.622688	-0.175455	8.97778e-53	0.798143	200012_x_at	NM_000982	RPL21	200013_at	NM_000986	RPL24
0.608335	-0.363679	1.68767e-51	0.972014	200012_x_at	NM_000982	RPL21	200023_s_at	NM_003754	EIF3F
-0.328405	0.34203	1.57647e-50	-0.670434	200007_at	NM_003134	SRP14	200009_at	NM_001494	GDI2
0.346013	-0.504426	1.22372e-49	0.850438	200013_at	NM_000986	RPL24	200016_x_at	NM_002136	HNRNPA1
0.313723	-0.35317	1.46958e-48	0.666892	200003_s_at	NM_000991	RPL28	200004_at	NM_001418	EIF4G2
0.136427	0.732937	5.89525e-48	-0.596511	200003_s_at	NM_000991	RPL28	200008_s_at	NM_001494	GDI2
0.520858	-0.265063	2.66978e-47	0.785921	200008_s_at	NM_001494	GDI2	200016_x_at	NM_002136	HNRNPA1
0.45734	-0.468741	6.54189e-47	0.926082	200012_x_at	NM_000982	RPL21	200014_s_at	NM_004500	HNRNPC
-0.418064	0.403646	1.22269e-46	-0.82171	200009_at	NM_001494	GDI2	200015_s_at	NM_004404	SEPT2
-0.548108	0.0334014	7.59697e-46	-0.58151	200009_at	NM_001494	GDI2	200010_at	NM_000975	RPL11
-0.183506	0.666023	2.74117e-45	-0.849529	200000_s_at	NM_006445	PRPF8	200017_at	NM_002954	RPS27A
-0.406	0.307405	8.31358e-45	-0.713405	1598_g_at	NM_006455	P3H4	200000_s_at	NM_006445	PRPF8
0.611976	-0.142841	2.11786e-44	0.754817	200000_s_at	NM_006445	PRPF8	200006_at	NM_007262	PARK7
0.355606	-0.255778	9.4627e-43	0.611384	200008_s_at	NM_001494	GDI2	200012_x_at	NM_000982	RPL21
-0.516109	0.0537329	6.13813e-42	-0.569842	200015_s_at	NM_004404	SEPT2	200022_at	NM_000979	RPL18
0.836432	0.112274	1.45475e-41	0.724159	200018_at	NM_001017	RPS13	200019_s_at	NM_001997	FAU
0.420628	-0.211391	1.30823e-40	0.632019	179_at	NM_005395	PMS2P3	200009_at	NM_001494	GDI2
0.429423	-0.377154	1.38034e-40	0.806577	200007_at	NM_003134	SRP14	200021_at	NM_005507	CFL1
-0.520857	0.27082	3.93486e-40	-0.791677	200001_at	NM_001749	CAPNS1	200013_at	NM_000986	RPL24
0.538039	0.936453	4.63866e-40	-0.398413	121_at	NM_013952	PAX8	179_at	NM_005395	PMS2P3
0.276493	-0.37887	3.20921e-39	0.655363	1487_at	NM_004451	ESRRA	200007_at	NM_003134	SRP14
0.333934	-0.202082	5.05687e-39	0.536016	179_at	NM_005395	PMS2P3	200023_s_at	NM_003754	EIF3F
-0.0427425	-0.574591	2.26206e-38	0.531849	1598_g_at	NM_006455	P3H4	200016_x_at	NM_002136	HNRNPA1
-0.198475	0.406705	7.68152e-38	-0.60518	200007_at	NM_003134	SRP14	200013_at	NM_000986	RPL24
-0.793184	-0.0696176	1.02498e-37	-0.723567	1487_at	NM_004451	ESRRA	200000_s_at	NM_006445	PRPF8
-0.547077	0.17162	1.59533e-37	-0.718697	179_at	NM_005395	PMS2P3	200000_s_at	NM_006445	PRPF8
-0.0475222	0.514871	3.35199e-37	-0.562394	200004_at	NM_001418	EIF4G2	200011_s_at	NM_001659	ARF3
0.0933723	-0.375366	4.49307e-37	0.468738	179_at	NM_005395	PMS2P3	200014_s_at	NM_004500	HNRNPC
0.508018	-0.0468758	6.76177e-37	0.554894	200002_at	NM_007209	RPL35	200021_at	NM_005507	CFL1
0.0894298	-0.589015	1.51815e-36	0.678445	179_at	NM_005395	PMS2P3	200010_at	NM_000975	RPL11
-0.383667	0.341467	4.4004e-36	-0.725134	200004_at	NM_001418	EIF4G2	200021_at	NM_005507	CFL1
-0.355774	0.160815	4.51943e-36	-0.51659	1007_s_at	NM_013993	DDR1	200000_s_at	NM_006445	PRPF8
-0.382382	0.270408	1.50497e-35	-0.65279	200004_at	NM_001418	EIF4G2	200007_at	NM_003134	SRP14
-0.317965	0.269458	1.56336e-35	-0.587423	200003_s_at	NM_000991	RPL28	200007_at	NM_003134	SRP14
0.655389	-0.0318301	1.95589e-35	0.687219	179_at	NM_005395	PMS2P3	200013_at	NM_000986	RPL24
0.409659	-0.228197	1.2073e-34	0.637856	200018_at	NM_001017	RPS13	200022_at	NM_000979	RPL18
-0.228142	0.277258	2.04183e-34	-0.505399	200004_at	NM_001418	EIF4G2	200016_x_at	NM_002136	HNRNPA1
0.184696	-0.451186	2.14672e-34	0.635883	200009_at	NM_001494	GDI2	200012_x_at	NM_000982	RPL21
0.029628	-0.493785	2.8458e-34	0.523413	121_at	NM_013952	PAX8	200005_at	NM_003753	EIF3D
-0.0438157	-0.646125	5.82568e-34	0.602309	1007_s_at	NM_013993	DDR1	200007_at	NM_003134	SRP14
-0.247916	0.355349	7.12637e-34	-0.603265	200001_at	NM_001749	CAPNS1	200007_at	NM_003134	SRP14
0.0240065	0.530315	3.00485e-33	-0.506308	200006_at	NM_007262	PARK7	200023_s_at	NM_003754	EIF3F
0.432146	-0.127023	3.47382e-33	0.559168	200007_at	NM_003134	SRP14	200016_x_at	NM_002136	HNRNPA1
0.524152	-0.173962	1.64976e-32	0.698114	200006_at	NM_007262	PARK7	200020_at	NM_007375	TARDBP
-0.535036	-0.106714	1.59908e-31	-0.428322	200001_at	NM_001749	CAPNS1	200010_at	NM_000975	RPL11
0.413174	-0.27617	4.10013e-31	0.689343	200000_s_at	NM_006445	PRPF8	200003_s_at	NM_000991	RPL28
-0.308408	0.242566	9.13146e-31	-0.550974	121_at	NM_013952	PAX8	200003_s_at	NM_000991	RPL28
-0.0725096	0.466803	9.92972e-31	-0.539313	200001_at	NM_001749	CAPNS1	200019_s_at	NM_001997	FAU
0.0557801	-0.376199	2.93665e-30	0.431979	1598_g_at	NM_006455	P3H4	200007_at	NM_003134	SRP14
0.232419	0.673239	5.04357e-30	-0.44082	200000_s_at	NM_006445	PRPF8	200001_at	NM_001749	CAPNS1
-0.216376	0.269582	7.86258e-30	-0.485958	200018_at	NM_001017	RPS13	200023_s_at	NM_003754	EIF3F
-0.533993	-0.086827	1.23128e-29	-0.447166	200006_at	NM_007262	PARK7	200022_at	NM_000979	RPL18
-0.435979	0.171857	6.9173e-29	-0.607836	200000_s_at	NM_006445	PRPF8	200007_at	NM_003134	SRP14
0.28947	-0.142964	1.91388e-28	0.432433	1007_s_at	NM_013993	DDR1	200011_s_at	NM_001659	ARF3
-0.21939	0.297197	2.06862e-28	-0.516587	179_at	NM_005395	PMS2P3	200020_at	NM_007375	TARDBP
0.423598	-0.13726	5.18039e-28	0.560857	179_at	NM_005395	PMS2P3	200008_s_at	NM_001494	GDI2
0.19935	-0.268357	6.49251e-28	0.467707	200000_s_at	NM_006445	PRPF8	200008_s_at	NM_001494	GDI2
0.513427	-0.0624779	9.34003e-28	0.575905	200002_at	NM_007209	RPL35	200016_x_at	NM_002136	HNRNPA1
-0.295021	0.254043	1.58015e-27	-0.549063	200009_at	NM_001494	GDI2	200017_at	NM_002954	RPS27A
0.201682	-0.271985	2.35805e-27	0.473667	200008_s_at	NM_001494	GDI2	200018_at	NM_001017	RPS13
-0.472308	0.0717169	2.63625e-27	-0.544025	200011_s_at	NM_001659	ARF3	200019_s_at	NM_001997	FAU
-0.651275	0.0320095	2.79491e-27	-0.683284	200000_s_at	NM_006445	PRPF8	200021_at	NM_005507	CFL1
0.622921	0.0229652	4.9116e-27	0.599956	200016_x_at	NM_002136	HNRNPA1	200023_s_at	NM_003754	EIF3F
-0.0309688	0.502741	1.89015e-26	-0.53371	200005_at	NM_003753	EIF3D	200019_s_at	NM_001997	FAU
-0.317306	0.173468	1.92505e-26	-0.490774	200010_at	NM_000975	RPL11	200019_s_at	NM_001997	FAU
0.307419	-0.209651	5.21264e-26	0.517071	1007_s_at	NM_013993	DDR1	200001_at	NM_001749	CAPNS1
-0.286381	0.253148	6.48477e-26	-0.539528	200014_s_at	NM_004500	HNRNPC	200022_at	NM_000979	RPL18
0.728914	0.376455	1.27428e-25	0.352459	200002_at	NM_007209	RPL35	200013_at	NM_000986	RPL24
0.314829	-0.170321	1.36409e-24	0.48515	121_at	NM_013952	PAX8	200009_at	NM_001494	GDI2
-0.231617	0.379633	1.68725e-24	-0.61125	200003_s_at	NM_000991	RPL28	200022_at	NM_000979	RPL18
-0.75729	-0.349369	2.32643e-24	-0.407921	200007_at	NM_003134	SRP14	200018_at	NM_001017	RPS13
0.0696433	-0.415435	6.65736e-24	0.485078	1487_at	NM_004451	ESRRA	200023_s_at	NM_003754	EIF3F
0.598401	0.170052	7.68874e-24	0.428349	160020_at	NM_004995	MMP14	200019_s_at	NM_001997	FAU
-0.318393	-0.767773	1.28685e-23	0.44938	200011_s_at	NM_001659	ARF3	200023_s_at	NM_003754	EIF3F
0.299909	0.726118	7.06867e-23	-0.426209	200003_s_at	NM_000991	RPL28	200013_at	NM_000986	RPL24
-0.522185	-0.0706652	7.50333e-23	-0.45152	1007_s_at	NM_013993	DDR1	200006_at	NM_007262	PARK7
-0.199639	0.213546	1.55808e-22	-0.413185	200002_at	NM_007209	RPL35	200020_at	NM_007375	TARDBP
0.52355	0.0957475	2.45333e-22	0.427803	179_at	NM_005395	PMS2P3	200012_x_at	NM_000982	RPL21
-0.0415497	0.389344	3.05191e-22	-0.430894	200015_s_at	NM_004404	SEPT2	200017_at	NM_002954	RPS27A
0.262327	-0.235734	3.75628e-22	0.498061	179_at	NM_005395	PMS2P3	200016_x_at	NM_002136	HNRNPA1
0.278686	-0.257531	4.06264e-22	0.536217	200016_x_at	NM_002136	HNRNPA1	200017_at	NM_002954	RPS27A
0.5704	0.23683	4.66686e-22	0.33357	160020_at	NM_004995	MMP14	200009_at	NM_001494	GDI2
0.476505	0.00216947	4.86265e-22	0.474335	1487_at	NM_004451	ESRRA	179_at	NM_005395	PMS2P3
0.329839	-0.0675354	5.1174e-22	0.397374	1598_g_at	NM_006455	P3H4	200021_at	NM_005507	CFL1
-0.106415	-0.510104	9.36444e-22	0.403689	160020_at	NM_004995	MMP14	200006_at	NM_007262	PARK7
-0.020206	0.450661	1.16048e-21	-0.470867	200005_at	NM_003753	EIF3D	200007_at	NM_003134	SRP14
-0.203114	0.239568	1.51411e-21	-0.442682	1487_at	NM_004451	ESRRA	200004_at	NM_001418	EIF4G2
-0.380776	0.074045	3.98853e-21	-0.454821	1487_at	NM_004451	ESRRA	200001_at	NM_001749	CAPNS1
0.144501	-0.321519	5.7187e-21	0.46602	200003_s_at	NM_000991	RPL28	200015_s_at	NM_004404	SEPT2
0.183709	0.63476	7.58264e-21	-0.451051	200003_s_at	NM_000991	RPL28	200019_s_at	NM_001997	FAU
-0.456047	0.133377	8.76835e-21	-0.589423	200020_at	NM_007375	TARDBP	200021_at	NM_005507	CFL1
-0.501771	-0.123542	8.99705e-21	-0.378228	179_at	NM_005395	PMS2P3	200004_at	NM_001418	EIF4G2
-0.0888436	0.377489	1.75902e-20	-0.466333	200017_at	NM_002954	RPS27A	200019_s_at	NM_001997	FAU
0.0690633	0.424036	3.18884e-20	-0.354973	200001_at	NM_001749	CAPNS1	200011_s_at	NM_001659	ARF3
-0.479142	-0.700638	8.94294e-20	0.221497	121_at	NM_013952	PAX8	200015_s_at	NM_004404	SEPT2
0.0614108	0.452182	9.37743e-20	-0.390771	200005_at	NM_003753	EIF3D	200010_at	NM_000975	RPL11
-0.315339	0.250472	9.74179e-20	-0.56581	200011_s_at	NM_001659	ARF3	200012_x_at	NM_000982	RPL21
0.669998	0.00426245	1.00635e-19	0.665735	1598_g_at	NM_006455	P3H4	200011_s_at	NM_001659	ARF3
-0.371639	0.0216924	1.24444e-19	-0.393331	200004_at	NM_001418	EIF4G2	200012_x_at	NM_000982	RPL21
-0.238078	0.19017	1.39756e-19	-0.428247	1007_s_at	NM_013993	DDR1	200023_s_at	NM_003754	EIF3F
0.0557076	0.503296	2.66189e-19	-0.447589	200003_s_at	NM_000991	RPL28	200023_s_at	NM_003754	EIF3F
0.568133	0.0336128	5.83017e-19	0.534521	200012_x_at	NM_000982	RPL21	200016_x_at	NM_002136	HNRNPA1
0.493913	0.741671	5.85103e-19	-0.247758	160020_at	NM_004995	MMP14	179_at	NM_005395	PMS2P3
-0.166852	0.378938	6.55204e-19	-0.54579	200005_at	NM_003753	EIF3D	200013_at	NM_000986	RPL24
-0.031255	-0.419807	1.33331e-18	0.388552	1007_s_at	NM_013993	DDR1	200008_s_at	NM_001494	GDI2
0.436489	0.0456022	1.46428e-18	0.390887	200010_at	NM_000975	RPL11	200012_x_at	NM_000982	RPL21
-0.253662	0.18073	2.12069e-18	-0.434392	200004_at	NM_001418	EIF4G2	200017_at	NM_002954	RPS27A
-0.278784	0.105738	2.12211e-18	-0.384522	200005_at	NM_003753	EIF3D	200022_at	NM_000979	RPL18
-0.10293	0.278085	3.48199e-18	-0.381015	200001_at	NM_001749	CAPNS1	200015_s_at	NM_004404	SEPT2
0.168287	-0.162007	6.3376e-18	0.330294	121_at	NM_013952	PAX8	200011_s_at	NM_001659	ARF3
-0.356664	0.0791397	1.03291e-17	-0.435804	200013_at	NM_000986	RPL24	200015_s_at	NM_004404	SEPT2
0.640138	0.354672	1.81353e-17	0.285465	179_at	NM_005395	PMS2P3	200022_at	NM_000979	RPL18
0.333752	-0.0734266	2.99089e-17	0.407178	121_at	NM_013952	PAX8	200001_at	NM_001749	CAPNS1
0.014386	-0.437436	4.88888e-17	0.451822	160020_at	NM_004995	MMP14	200016_x_at	NM_002136	HNRNPA1
-0.0450889	-0.384922	5.96999e-17	0.339833	160020_at	NM_004995	MMP14	200005_at	NM_003753	EIF3D
0.378458	-0.298199	6.51949e-17	0.676657	200017_at	NM_002954	RPS27A	200021_at	NM_005507	CFL1
-0.0444954	0.271507	8.2616e-17	-0.316002	1598_g_at	NM_006455	P3H4	200013_at	NM_000986	RPL24
0.180592	-0.275533	8.83978e-17	0.456125	200002_at	NM_007209	RPL35	200017_at	NM_002954	RPS27A
0.218718	-0.130552	9.76693e-17	0.34927	200004_at	NM_001418	EIF4G2	200014_s_at	NM_004500	HNRNPC
-0.0317522	-0.366871	1.66477e-16	0.335119	1007_s_at	NM_013993	DDR1	200009_at	NM_001494	GDI2
-0.0549579	-0.498889	2.80067e-16	0.443931	200009_at	NM_001494	GDI2	200016_x_at	NM_002136	HNRNPA1
-0.347615	-0.658099	3.26178e-16	0.310484	179_at	NM_005395	PMS2P3	200006_at	NM_007262	PARK7
0.67103	0.379142	4.1357e-16	0.291889	200009_at	NM_001494	GDI2	200019_s_at	NM_001997	FAU
-0.14651	-0.518315	4.24101e-16	0.371804	200009_at	NM_001494	GDI2	200021_at	NM_005507	CFL1
0.197764	-0.269474	5.03101e-16	0.467238	200012_x_at	NM_000982	RPL21	200022_at	NM_000979	RPL18
-0.245321	0.14559	5.45174e-16	-0.390911	200007_at	NM_003134	SRP14	200022_at	NM_000979	RPL18
0.46389	0.0375405	6.98463e-16	0.42635	200004_at	NM_001418	EIF4G2	200020_at	NM_007375	TARDBP
0.382183	0.0452133	1.84244e-15	0.336969	200008_s_at	NM_001494	GDI2	200010_at	NM_000975	RPL11
0.498384	0.0970088	3.83361e-15	0.401375	121_at	NM_013952	PAX8	200019_s_at	NM_001997	FAU
0.422498	0.0568003	5.39711e-15	0.365697	179_at	NM_005395	PMS2P3	200002_at	NM_007209	RPL35
0.476579	0.069326	7.84572e-15	0.407254	179_at	NM_005395	PMS2P3	200019_s_at	NM_001997	FAU
0.471175	0.0519864	9.10454e-15	0.419188	1487_at	NM_004451	ESRRA	200017_at	NM_002954	RPS27A
0.0436067	-0.317901	9.42917e-15	0.361508	200000_s_at	NM_006445	PRPF8	200023_s_at	NM_003754	EIF3F
0.49509	0.154867	1.06743e-14	0.340223	1007_s_at	NM_013993	DDR1	200022_at	NM_000979	RPL18
0.0505707	-0.324263	1.17445e-14	0.374834	200000_s_at	NM_006445	PRPF8	200016_x_at	NM_002136	HNRNPA1
0.346274	0.0615847	1.4626e-14	0.284689	200010_at	NM_000975	RPL11	200013_at	NM_000986	RPL24
0.70098	0.339964	2.65076e-14	0.361016	200002_at	NM_007209	RPL35	200012_x_at	NM_000982	RPL21
0.0517564	-0.423378	7.4602e-14	0.475135	200012_x_at	NM_000982	RPL21	200017_at	NM_002954	RPS27A
-0.177453	-0.480792	1.57329e-13	0.303339	179_at	NM_005395	PMS2P3	200005_at	NM_003753	EIF3D
-0.247687	0.129215	1.68605e-13	-0.376901	200020_at	NM_007375	TARDBP	200023_s_at	NM_003754	EIF3F
0.19601	0.496343	2.53225e-13	-0.300333	200005_at	NM_003753	EIF3D	200006_at	NM_007262	PARK7
0.283452	-0.106232	3.62865e-13	0.389684	179_at	NM_005395	PMS2P3	200017_at	NM_002954	RPS27A
0.216627	-0.193016	5.16002e-13	0.409644	200007_at	NM_003134	SRP14	200012_x_at	NM_000982	RPL21
-0.550489	-0.145811	5.25577e-13	-0.404678	1598_g_at	NM_006455	P3H4	200003_s_at	NM_000991	RPL28
0.489006	0.202805	5.932e-13	0.286201	121_at	NM_013952	PAX8	1598_g_at	NM_006455	P3H4
0.453256	0.11509	6.08838e-13	0.338166	200003_s_at	NM_000991	RPL28	200014_s_at	NM_004500	HNRNPC
-0.0606106	0.336722	8.81041e-13	-0.397332	200005_at	NM_003753	EIF3D	200009_at	NM_001494	GDI2
-0.280926	0.0648909	1.09732e-12	-0.345817	121_at	NM_013952	PAX8	200012_x_at	NM_000982	RPL21
-0.414964	-0.014608	1.94294e-12	-0.400356	200018_at	NM_001017	RPS13	200021_at	NM_005507	CFL1
0.22397	0.605275	2.07851e-12	-0.381305	200002_at	NM_007209	RPL35	200003_s_at	NM_000991	RPL28
-0.0457917	-0.40047	2.19398e-12	0.354678	1487_at	NM_004451	ESRRA	200009_at	NM_001494	GDI2
0.209798	-0.129256	3.24074e-12	0.339054	121_at	NM_013952	PAX8	200008_s_at	NM_001494	GDI2
0.346169	-0.0845123	4.47539e-12	0.430682	200005_at	NM_003753	EIF3D	200020_at	NM_007375	TARDBP
-0.0295298	0.270464	4.76075e-12	-0.299994	1007_s_at	NM_013993	DDR1	200020_at	NM_007375	TARDBP
-0.274359	0.126566	4.88988e-12	-0.400925	179_at	NM_005395	PMS2P3	200003_s_at	NM_000991	RPL28
-0.0138764	-0.372562	5.42584e-12	0.358686	1487_at	NM_004451	ESRRA	200019_s_at	NM_001997	FAU
0.29101	-0.0893351	5.92709e-12	0.380345	200013_at	NM_000986	RPL24	200018_at	NM_001017	RPS13
-0.12939	0.179643	7.25325e-12	-0.309032	121_at	NM_013952	PAX8	200002_at	NM_007209	RPL35
0.263315	-0.0706767	7.51232e-12	0.333992	200008_s_at	NM_001494	GDI2	200017_at	NM_002954	RPS27A
0.0463736	0.418408	7.80722e-12	-0.372034	200001_at	NM_001749	CAPNS1	200009_at	NM_001494	GDI2
-0.172633	-0.494126	9.24876e-12	0.321492	121_at	NM_013952	PAX8	200006_at	NM_007262	PARK7
0.311185	-0.0242968	1.03755e-11	0.335482	121_at	NM_013952	PAX8	1487_at	NM_004451	ESRRA
0.142922	0.489839	1.1243e-11	-0.346916	200009_at	NM_001494	GDI2	200020_at	NM_007375	TARDBP
0.218249	-0.142349	1.31134e-11	0.360598	1487_at	NM_004451	ESRRA	200010_at	NM_000975	RPL11
-0.37449	-0.66765	3.22529e-11	0.29316	200005_at	NM_003753	EIF3D	200012_x_at	NM_000982	RPL21
0.423867	0.114733	4.39963e-11	0.309134	160020_at	NM_004995	MMP14	200013_at	NM_000986	RPL24
0.0926	0.304797	1.4335e-10	-0.212197	200010_at	NM_000975	RPL11	200014_s_at	NM_004500	HNRNPC
-0.0948691	0.244881	1.5233e-10	-0.33975	200000_s_at	NM_006445	PRPF8	200010_at	NM_000975	RPL11
-0.318984	-0.58597	1.62808e-10	0.266987	121_at	NM_013952	PAX8	200010_at	NM_000975	RPL11
-0.643855	-0.327756	1.65152e-10	-0.316099	200001_at	NM_001749	CAPNS1	200012_x_at	NM_000982	RPL21
-0.529673	-0.203412	2.34969e-10	-0.326261	200003_s_at	NM_000991	RPL28	200017_at	NM_002954	RPS27A
-0.282536	-0.58781	2.46802e-10	0.305274	1487_at	NM_004451	ESRRA	200003_s_at	NM_000991	RPL28
-0.341051	0.0209732	2.58493e-10	-0.362024	1598_g_at	NM_006455	P3H4	200009_at	NM_001494	GDI2
0.158448	0.500347	3.20949e-10	-0.341899	160020_at	NM_004995	MMP14	200022_at	NM_000979	RPL18
-0.413446	-0.182178	4.24235e-10	-0.231268	200011_s_at	NM_001659	ARF3	200013_at	NM_000986	RPL24
-0.110025	0.242009	5.21605e-10	-0.352033	1487_at	NM_004451	ESRRA	200018_at	NM_001017	RPS13
-0.149606	0.24367	6.24413e-10	-0.393276	1598_g_at	NM_006455	P3H4	200012_x_at	NM_000982	RPL21
0.392936	0.610027	6.60224e-10	-0.217091	1007_s_at	NM_013993	DDR1	179_at	NM_005395	PMS2P3
0.326669	0.0133599	6.8531e-10	0.313309	1598_g_at	NM_006455	P3H4	200022_at	NM_000979	RPL18
0.0843824	-0.233576	1.11522e-09	0.317959	121_at	NM_013952	PAX8	200017_at	NM_002954	RPS27A
-0.224855	-0.444042	1.40803e-09	0.219187	1007_s_at	NM_013993	DDR1	200015_s_at	NM_004404	SEPT2
0.211369	-0.105771	1.43179e-09	0.317139	200001_at	NM_001749	CAPNS1	200020_at	NM_007375	TARDBP
-0.0108523	0.305592	1.83296e-09	-0.316445	200002_at	NM_007209	RPL35	200019_s_at	NM_001997	FAU
-0.195656	0.115686	2.08597e-09	-0.311342	200008_s_at	NM_001494	GDI2	200015_s_at	NM_004404	SEPT2
-0.452743	-0.17588	2.59891e-09	-0.276863	200015_s_at	NM_004404	SEPT2	200019_s_at	NM_001997	FAU
-0.678979	-0.410013	3.75516e-09	-0.268967	200003_s_at	NM_000991	RPL28	200011_s_at	NM_001659	ARF3
-0.445039	-0.17236	6.2628e-09	-0.272679	200009_at	NM_001494	GDI2	200011_s_at	NM_001659	ARF3
0.0229177	0.276393	8.59002e-09	-0.253476	200008_s_at	NM_001494	GDI2	200022_at	NM_000979	RPL18
0.314122	0.068266	1.0966e-08	0.245856	200001_at	NM_001749	CAPNS1	200004_at	NM_001418	EIF4G2
-0.0624299	0.217667	1.29132e-08	-0.280097	200004_at	NM_001418	EIF4G2	200019_s_at	NM_001997	FAU
-0.299853	0.0257893	1.36977e-08	-0.325642	121_at	NM_013952	PAX8	200000_s_at	NM_006445	PRPF8
-0.135541	0.232117	1.42171e-08	-0.367659	121_at	NM_013952	PAX8	200021_at	NM_005507	CFL1
-0.215064	0.0744351	1.42171e-08	-0.289499	179_at	NM_005395	PMS2P3	200001_at	NM_001749	CAPNS1
0.44267	0.21572	1.93444e-08	0.22695	200010_at	NM_000975	RPL11	200016_x_at	NM_002136	HNRNPA1
0.467982	0.148191	2.42806e-08	0.319791	200014_s_at	NM_004500	HNRNPC	200016_x_at	NM_002136	HNRNPA1
0.0180871	0.293028	3.61741e-08	-0.27494	200010_at	NM_000975	RPL11	200011_s_at	NM_001659	ARF3
0.203169	-0.0872678	4.32377e-08	0.290437	200004_at	NM_001418	EIF4G2	200006_at	NM_007262	PARK7
0.165133	-0.11175	4.59615e-08	0.276883	200008_s_at	NM_001494	GDI2	200020_at	NM_007375	TARDBP
-0.281961	-0.0484386	8.24461e-08	-0.233523	121_at	NM_013952	PAX8	200023_s_at	NM_003754	EIF3F
0.0753145	-0.168189	1.0829e-07	0.243504	1598_g_at	NM_006455	P3H4	200010_at	NM_000975	RPL11
0.432183	0.14891	1.17739e-07	0.283273	200000_s_at	NM_006445	PRPF8	200020_at	NM_007375	TARDBP
-0.0171611	-0.32585	1.19961e-07	0.308689	1487_at	NM_004451	ESRRA	200005_at	NM_003753	EIF3D
0.467135	0.259255	1.6625e-07	0.20788	121_at	NM_013952	PAX8	200018_at	NM_001017	RPS13
-0.227885	0.115164	3.27913e-07	-0.343049	200017_at	NM_002954	RPS27A	200018_at	NM_001017	RPS13
-0.20718	0.109952	3.95791e-07	-0.317132	200006_at	NM_007262	PARK7	200017_at	NM_002954	RPS27A
0.252482	-0.068436	4.08005e-07	0.320918	200003_s_at	NM_000991	RPL28	200018_at	NM_001017	RPS13
-0.162994	0.0767853	4.40783e-07	-0.239779	179_at	NM_005395	PMS2P3	200011_s_at	NM_001659	ARF3
-0.195586	0.0622432	5.52866e-07	-0.25783	200001_at	NM_001749	CAPNS1	200008_s_at	NM_001494	GDI2
-0.108832	-0.328951	6.54258e-07	0.22012	200004_at	NM_001418	EIF4G2	200023_s_at	NM_003754	EIF3F
0.106976	0.362088	1.30344e-06	-0.255111	200005_at	NM_003753	EIF3D	200023_s_at	NM_003754	EIF3F
-0.190703	0.0225894	1.53198e-06	-0.213292	1007_s_at	NM_013993	DDR1	200016_x_at	NM_002136	HNRNPA1
-0.155901	-0.399276	1.7432e-06	0.243374	121_at	NM_013952	PAX8	200007_at	NM_003134	SRP14
0.249835	0.503022	2.02505e-06	-0.253187	200007_at	NM_003134	SRP14	200010_at	NM_000975	RPL11
0.137174	0.414237	2.43456e-06	-0.277063	200000_s_at	NM_006445	PRPF8	200019_s_at	NM_001997	FAU
0.136887	-0.0864174	3.0472e-06	0.223304	200007_at	NM_003134	SRP14	200023_s_at	NM_003754	EIF3F
0.447793	0.626285	3.28487e-06	-0.178492	1007_s_at	NM_013993	DDR1	121_at	NM_013952	PAX8
-0.564944	-0.300666	3.39368e-06	-0.264278	200001_at	NM_001749	CAPNS1	200021_at	NM_005507	CFL1
0.528352	0.27593	5.47214e-06	0.252422	200010_at	NM_000975	RPL11	200017_at	NM_002954	RPS27A
-0.0353077	-0.287669	5.76804e-06	0.252362	200015_s_at	NM_004404	SEPT2	200021_at	NM_005507	CFL1
0.388376	0.0611624	5.77722e-06	0.327213	200010_at	NM_000975	RPL11	200021_at	NM_005507	CFL1
-0.190539	0.0403421	1.3924e-05	-0.230881	1007_s_at	NM_013993	DDR1	200003_s_at	NM_000991	RPL28
-0.00681474	-0.296758	2.08868e-05	0.289944	179_at	NM_005395	PMS2P3	200007_at	NM_003134	SRP14
0.0261325	-0.233497	2.31442e-05	0.259629	200012_x_at	NM_000982	RPL21	200019_s_at	NM_001997	FAU
0.0318193	0.25468	2.59964e-05	-0.222861	200022_at	NM_000979	RPL18	200023_s_at	NM_003754	EIF3F
0.0972821	-0.113368	3.08443e-05	0.21065	1487_at	NM_004451	ESRRA	160020_at	NM_004995	MMP14
-0.643542	-0.475357	3.17553e-05	-0.168184	200001_at	NM_001749	CAPNS1	200002_at	NM_007209	RPL35
0.407039	0.209366	3.79703e-05	0.197673	200009_at	NM_001494	GDI2	200018_at	NM_001017	RPS13
-0.174331	0.0334979	3.85279e-05	-0.207829	160020_at	NM_004995	MMP14	200021_at	NM_005507	CFL1
0.217873	-0.0427951	4.13252e-05	0.260668	121_at	NM_013952	PAX8	200013_at	NM_000986	RPL24
-0.168119	0.0949428	4.13252e-05	-0.263062	200000_s_at	NM_006445	PRPF8	200013_at	NM_000986	RPL24
-0.198306	0.0453043	4.41458e-05	-0.24361	1487_at	NM_004451	ESRRA	200015_s_at	NM_004404	SEPT2
-0.110428	-0.313061	5.6854e-05	0.202633	1007_s_at	NM_013993	DDR1	200010_at	NM_000975	RPL11
0.268323	0.491046	6.72885e-05	-0.222723	200009_at	NM_001494	GDI2	200022_at	NM_000979	RPL18
0.532958	0.703339	7.08121e-05	-0.170381	200013_at	NM_000986	RPL24	200019_s_at	NM_001997	FAU
-0.33394	-0.0989131	0.000127771	-0.235027	200010_at	NM_000975	RPL11	200018_at	NM_001017	RPS13
-0.282038	-0.0220388	0.00014346	-0.26	200006_at	NM_007262	PARK7	200007_at	NM_003134	SRP14
-0.367483	-0.13414	0.000275241	-0.233344	1598_g_at	NM_006455	P3H4	200006_at	NM_007262	PARK7
-0.278564	-0.00751596	0.000314402	-0.271048	200002_at	NM_007209	RPL35	200018_at	NM_001017	RPS13
0.2404	0.421387	0.000390476	-0.180987	121_at	NM_013952	PAX8	200020_at	NM_007375	TARDBP
0.19568	-0.0171034	0.000398133	0.212783	160020_at	NM_004995	MMP14	200008_s_at	NM_001494	GDI2
-0.0590348	0.175698	0.000402052	-0.234732	200001_at	NM_001749	CAPNS1	200022_at	NM_000979	RPL18
0.124743	0.320815	0.000466096	-0.196072	200006_at	NM_007262	PARK7	200019_s_at	NM_001997	FAU
0.240194	0.0294187	0.000478559	0.210776	200013_at	NM_000986	RPL24	200014_s_at	NM_004500	HNRNPC
0.172533	0.420367	0.000632545	-0.247834	160020_at	NM_004995	MMP14	200002_at	NM_007209	RPL35
0.249957	0.438906	0.00068071	-0.18895	1598_g_at	NM_004995	MMP14	200001_at	NM_007375	TARDBP
0.0533599	0.249569	0.00068071	-0.196209	160020_at	NM_006455	P3H4	200020_at	NM_001749	CAPNS1
-0.246701	-0.467088	0.000693988	0.220387	200019_s_at	NM_001997	FAU	200021_at	NM_005507	CFL1
0.37555	0.604434	0.00137836	-0.228884	200005_at	NM_003753	EIF3D	200017_at	NM_002954	RPS27A
-0.0103421	0.209749	0.00141415	-0.220091	1007_s_at	NM_013993	DDR1	200012_x_at	NM_000982	RPL21
0.164147	0.364558	0.00243412	-0.200412	200013_at	NM_000986	RPL24	200017_at	NM_002954	RPS27A
-0.413761	-0.596403	0.00336427	0.182642	200001_at	NM_001749	CAPNS1	200016_x_at	NM_002136	HNRNPA1
0.0378202	0.247105	0.00338805	-0.209285	200000_s_at	NM_006445	PRPF8	200009_at	NM_001494	GDI2
0.406983	0.225628	0.00378078	0.181355	200002_at	NM_007209	RPL35	200010_at	NM_000975	RPL11
0.148106	0.33236	0.00424744	-0.184255	1007_s_at	NM_013993	DDR1	200018_at	NM_001017	RPS13
0.449426	0.212135	0.0043716	0.237291	200006_at	NM_007262	PARK7	200008_s_at	NM_001494	GDI2
-0.425517	-0.218863	0.00449433	-0.206655	200007_at	NM_003134	SRP14	200020_at	NM_007375	TARDBP
0.473516	0.261752	0.00787296	0.211764	1487_at	NM_004451	ESRRA	1598_g_at	NM_006455	P3H4
-0.342255	-0.103333	0.00985138	-0.238922	200012_x_at	NM_000982	RPL21	200020_at	NM_007375	TARDBP
0.311317	0.115506	0.02155	0.195811	200019_s_at	NM_001997	FAU	200020_at	NM_007375	TARDBP
-0.309207	-0.147407	0.0217638	-0.1618	121_at	NM_013952	PAX8	200004_at	NM_001418	EIF4G2
-0.0819734	-0.247306	0.0294187	0.165333	200014_s_at	NM_004500	HNRNPC	200021_at	NM_005507	CFL1
0.0308623	-0.13041	0.0309239	0.161272	200015_s_at	NM_004404	SEPT2	200016_x_at	NM_002136	HNRNPA1
0.421854	0.201781	0.0339853	0.220072	179_at	NM_005395	PMS2P3	200021_at	NM_005507	CFL1
